# Supplementary material for: Structural Basis for Broad HIV-1 Neutralization by the MPER-Specific Human Broadly Neutralizing Antibody LN01
Source: PubMed Central journal article supplement (PMC6854463; doi:10.1016/j.chom.2019.09.016), 2019-11-13
Supplement: mmc1.pdf [file mmc1.pdf]

**Cell Host & Microbe, Volume 26**

**Supplemental Information**

**Structural Basis for Broad HIV-1 Neutralization**

**by the MPER-Specific Human Broadly**

**Neutralizing Antibody LN01**

**Dora Pinto, Craig Fenwick, Christophe Caillat, Chiara Silacci, Serafima Guseva, François Dehez, Christophe Chipot, Sonia Barbieri, Andrea Minola, David Jarrossay, Georgia D. Tomaras, Xiaoying Shen, Agostino Riva, Maciej Tarkowski, Olivier Schwartz, Timothée Bruel, Jérémy Duffoo, Michael S. Seaman, David C. Montefiori, Antonio Lanzavecchia, Davide Corti, Giuseppe Pantaleo, and Winfried Weissenhorn**

## **Supplemental Information**

### **Structural basis for broad HIV-1 neutralization by the MPER-specific human broadly neutralizing antibody LN01**

Dora Pinto, Craig Fenwick, Christophe Caillat, Chiara Silacci, Serafima Guseva, François Dehez, Christophe Chipot, Sonia Barbieri, Andrea Minola, David Jarrossay, Georgia D. Tomaras, Xiaoying Shen, Agostino Riva, Maciej Tarkowski, Olivier Schwartz, Timothée Bruel, Jérémy Dufloo, Michael S. Seaman, David C. Montefiori, Antonio Lanzavecchia, Davide Corti, Giuseppe Pantaleo, Winfried Weissenhorn

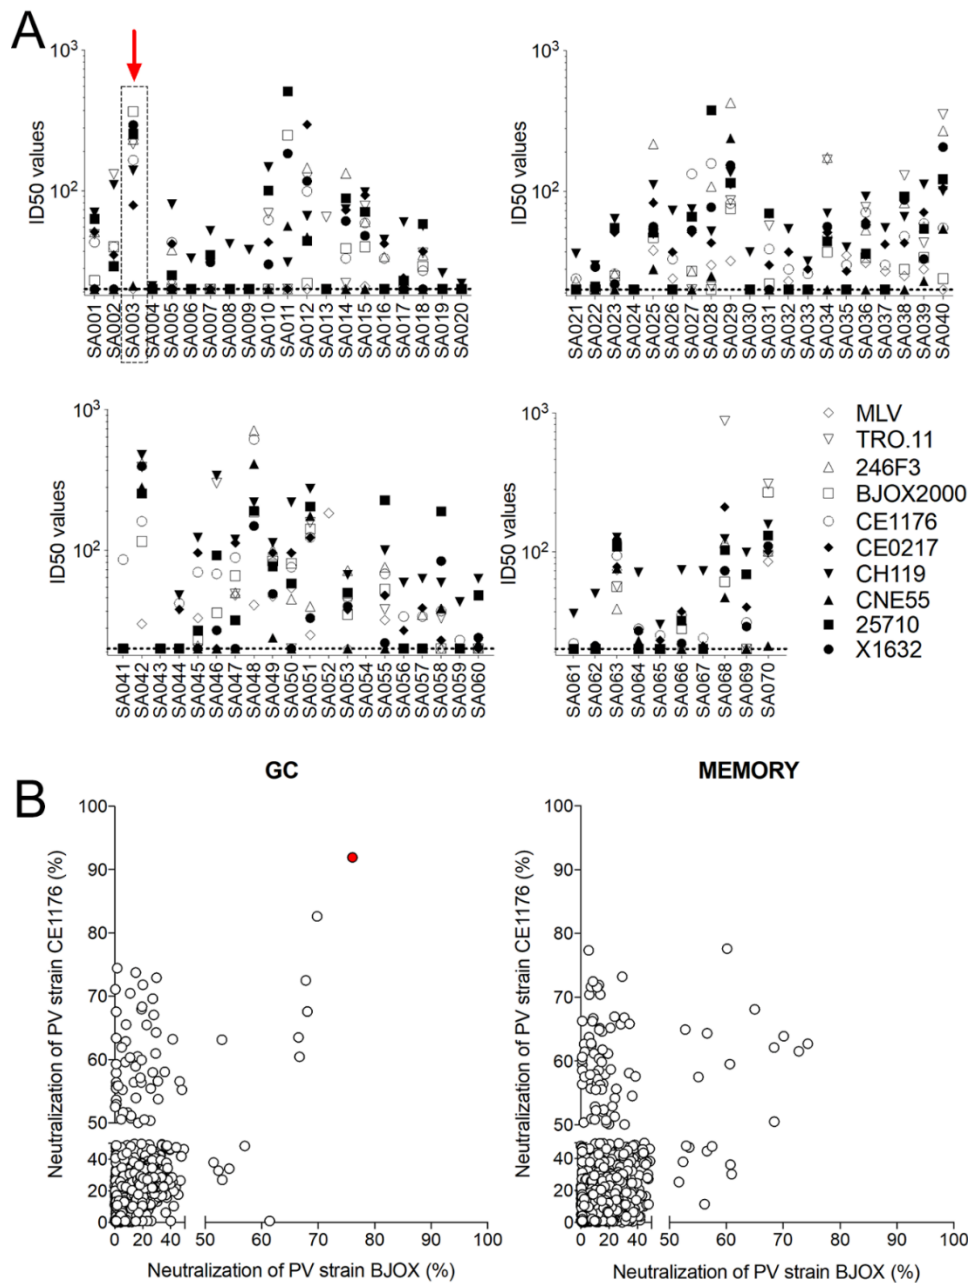

**Figure S1 related to Figure 1. Selection of HIV-1 patients for the presence of broad neutralizing activity in the serum and identification of the LN01 mAb.**

(A) A cohort (n=70) of patients chronically infected with HIV-1 clade B or clade C were screened for the presence of high titers of antibodies able to neutralize a panel of nine HIV-1 PVs from the Global Panel of HIV-1 reference strains. The sera were tested in neutralization assay using TZM-bl cells and the ID50s (y-axis) were determined.

(B) Identification of LN01 mAb. IgG GC and IgG memory B cells isolated from LNMC of an HIV-1 infected donor were seeded on MSC at 3 c/well in 384-well plates in the presence of IL-2, IL-6, IL-21, BCR-trigger and EBV. After 14 days of culture, supernatants were collected and tested for their ability to neutralize HIV-1 strains CE1176 and BJOX PV using a TZMbl-base micro-neutralization assay.

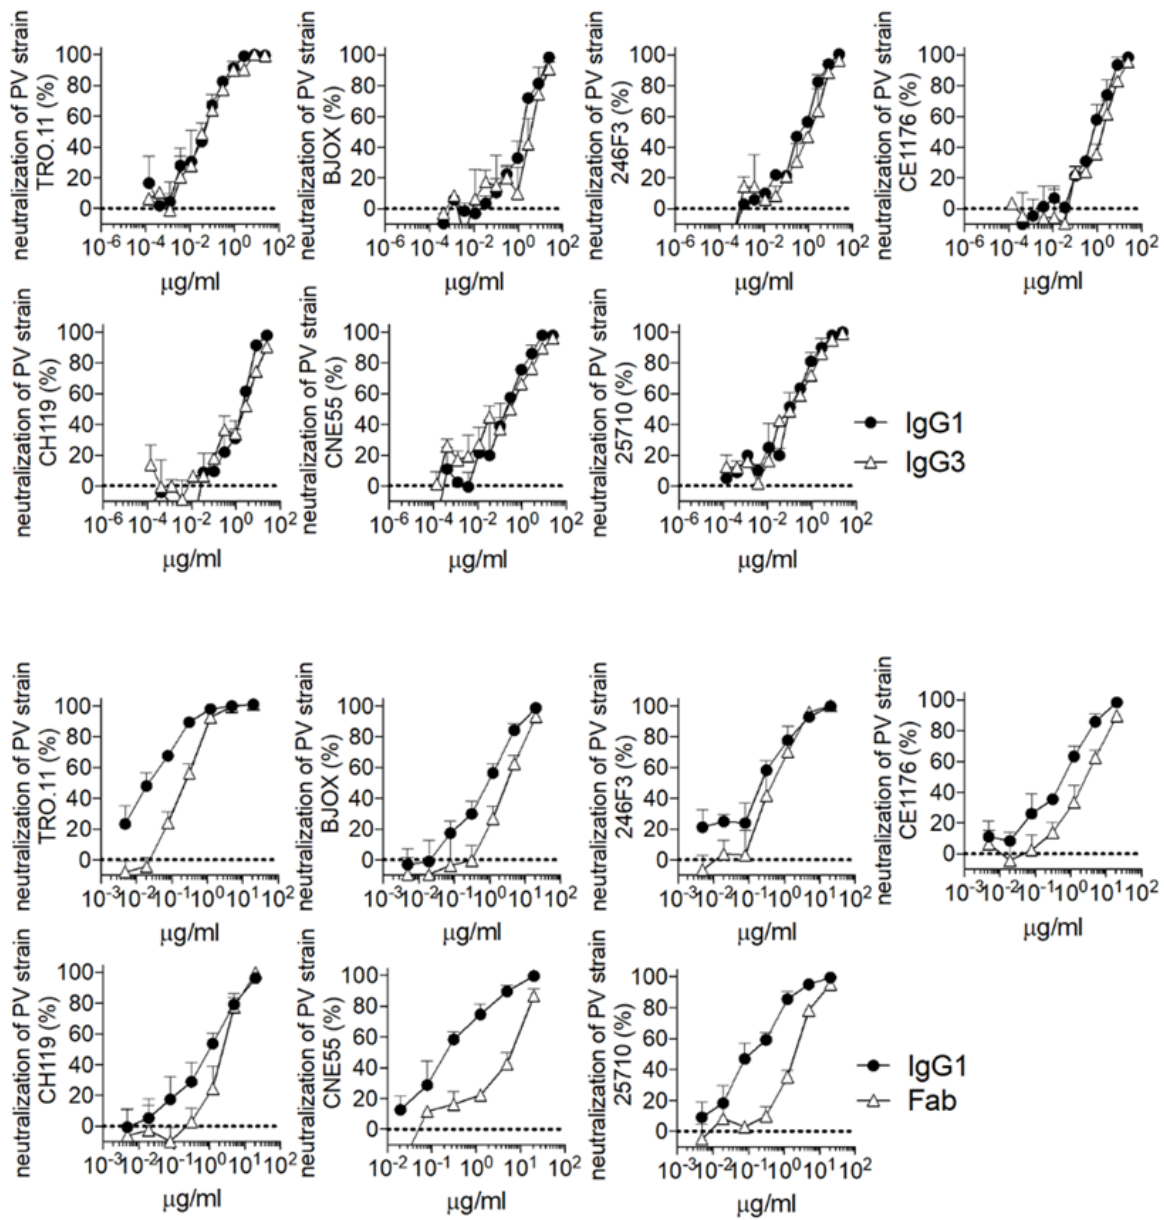

**Figure S2 related to Figures 1C and 3A, B. Neutralizing activity of LN01 IgG1, IgG3 and Fab Ig formats.**

Percentage of neutralization of LN01 IgG1 compared to LN01 IgG3 (top panel) and LN01 Fab fragment (bottom panel) against seven HIV-1 PVs of the Global Panel. Serial dilutions of the recombinant mAbs were incubated with HIV-1 PVs and then added to the TZM-bl target cells.

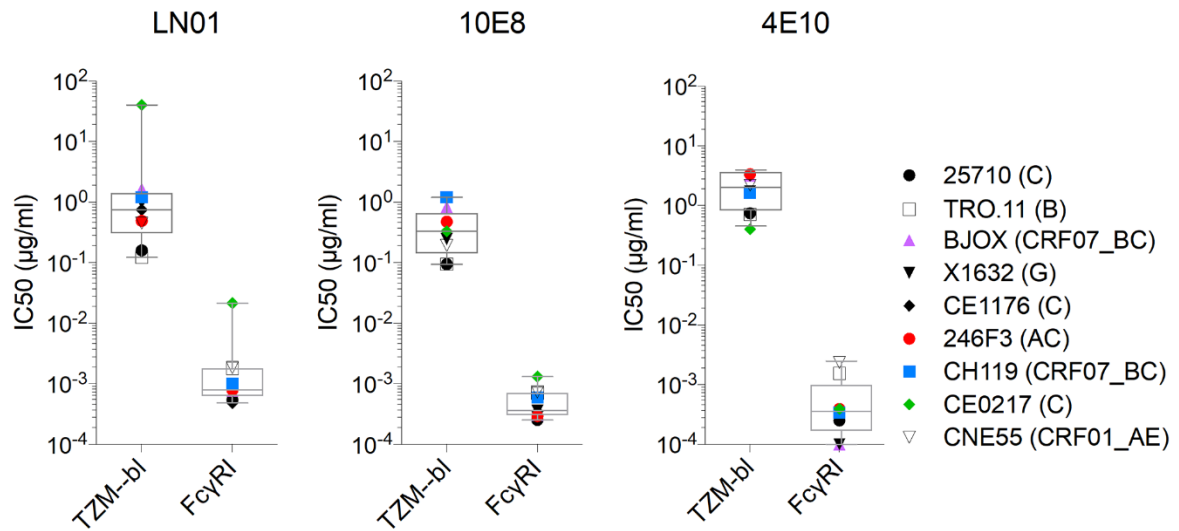

**Figure S3 related to Figures 1C and 3A, B. Fc $\gamma$ RI expression on target cells greatly enhances HIV-1 neutralization by anti-MPER broadly neutralizing mAbs.**

LN01 mAb and the two other anti-MPER mAbs 10E8 and 4E10 were tested for their neutralizing activity against nine HIV-1 PVs of the Global Panel using either parental TZM-bl cells or TZM-bl cells expressing human Fc $\gamma$ RI. The IC<sub>50</sub> values expressed in µg/ml are shown.

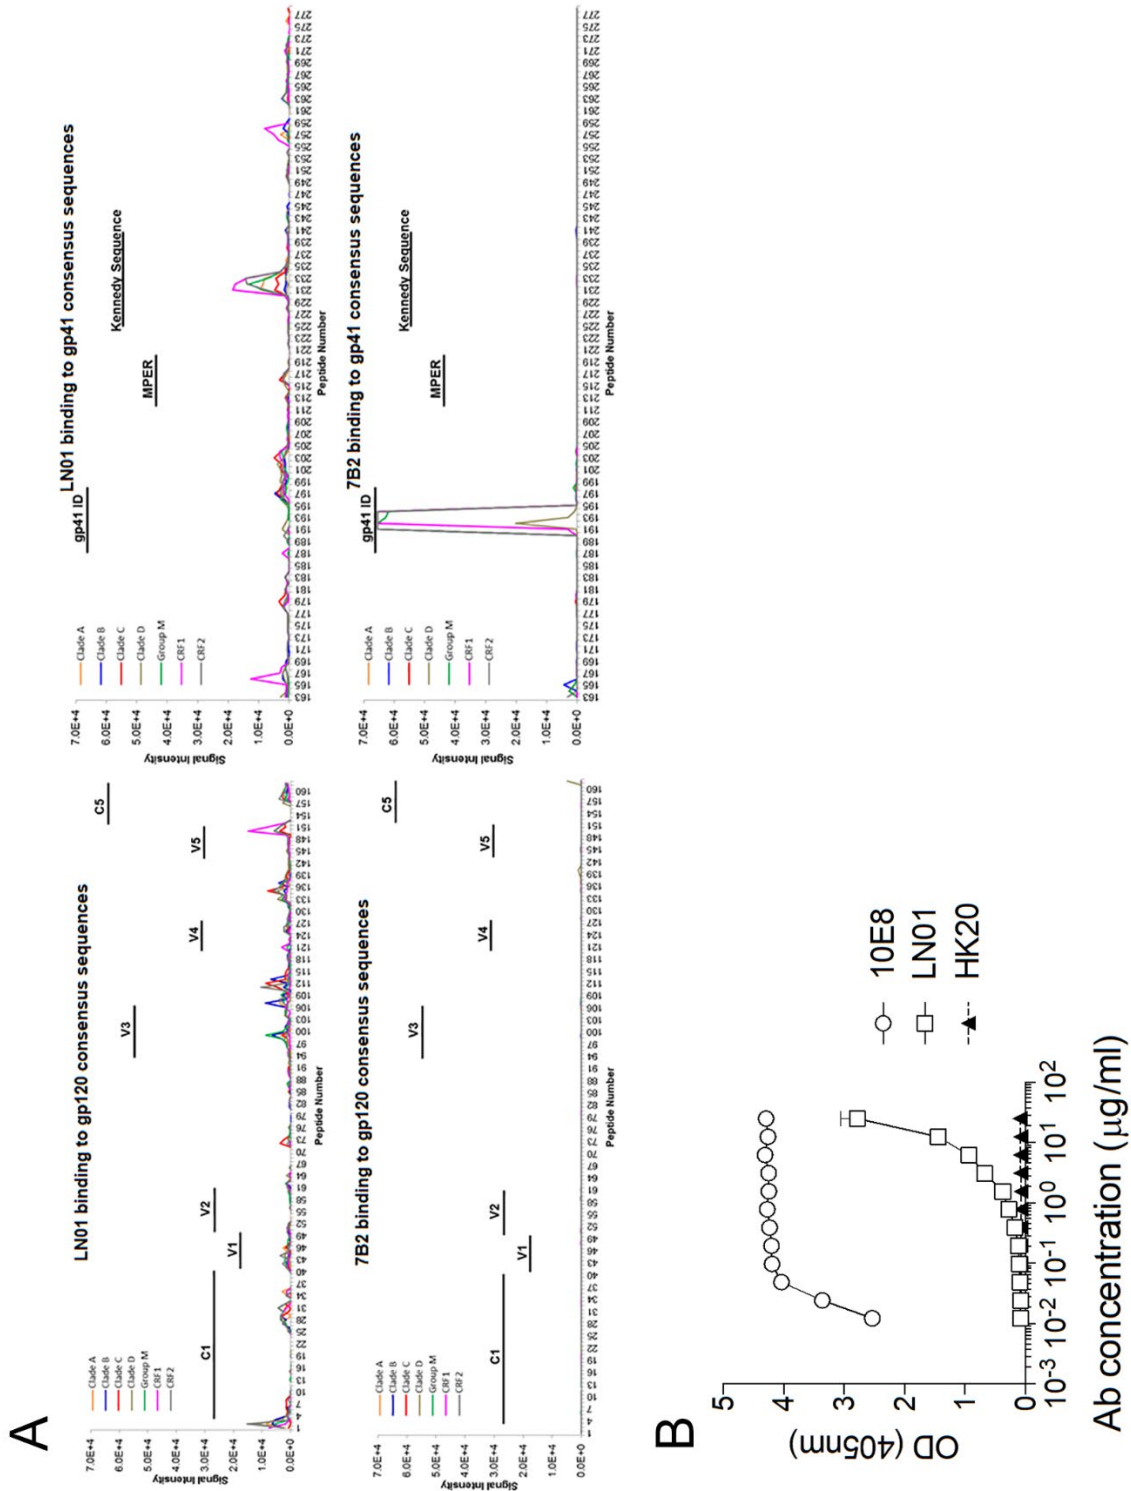

**Figure S4 related to Figure 4. LN01 epitope specificity and binding.**

(A) Binding of LN01 and 7B2 mAbs to an array of 1423 15-mer peptides, overlapping by 12 amino acids, that cover the full length of the consensus HIV-1 Env gp160 sequences for clades A, B, C, D, group M, CRF01\_AE and CRF02\_AG. Signals below  $2.0\text{E}+4$  are scored as negative. As expected 7B2 reacts with the gp41 immuno-dominant region.

(B) LN01, 10E8 and HK20 (HR1 specific) mAbs were tested in ELISA for binding to a 28 amino acids long peptide encompassing the entire gp41 MPER. Shown are the OD values at 405 nm.

**A**

MPER-TM1: 671-NWFDITNWLWYIKLFIMIV-689-KKKKKK  
 MPER-TM2: 630 - 650...671-NWFNITNWLWYIKLFIMIVGGLVGLRIVFAVLSVVNRVRQG -711

**B**

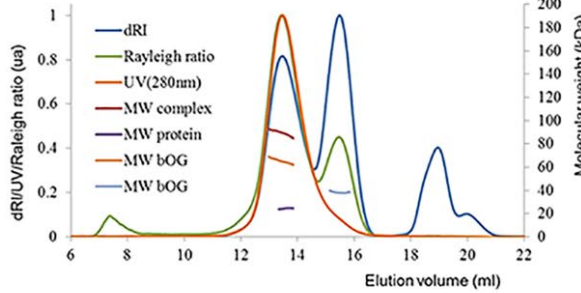

**C**

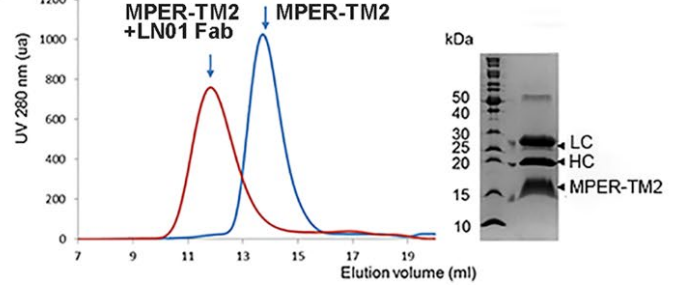

**D**

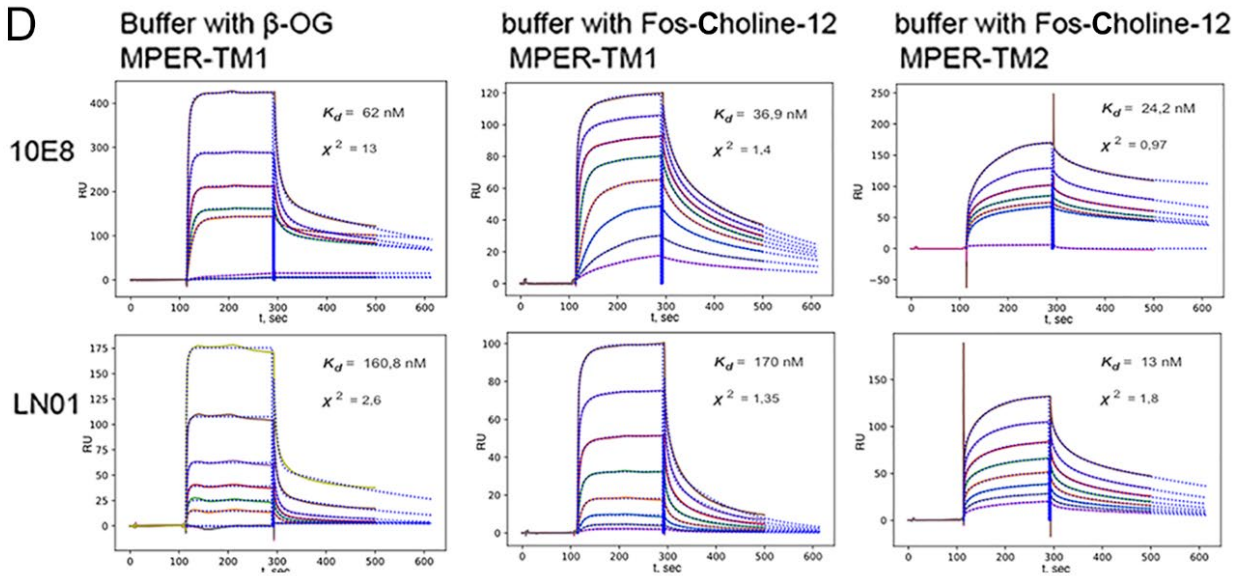

**E**

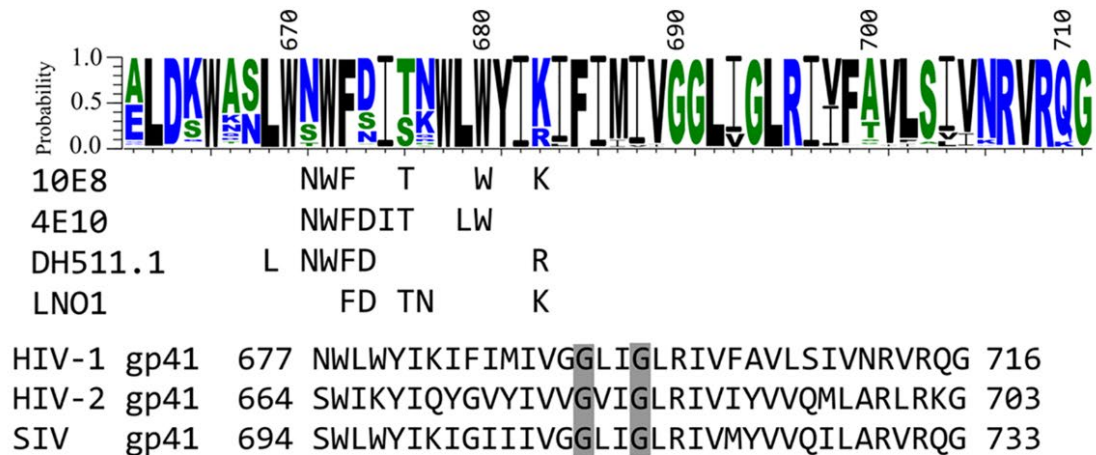

**Figure S5 related to Figures 5 and 6. Sequence conservation of MPER and interaction of LN01 with gp41 peptides.**

(A) Sequences of gp41 peptides, MPER-TM1 and MPER-TM-2 used in this study. Two forms of MPER-TM2 were expressed, gp41 residues 630 to 711, which was used for experiments

shown in D and MPER-TM2 residues 650 to 711 used for all other MPER-TM2 experiments. MPER-TM2 650 to 711 was generated by an engineered TEV site in the original 630 to 711 construct. The MPER sequence present in the structures is drawn in purple and the transmembrane region in beige.

(B) MPER-TM2 forms trimers in a buffer containing  $\beta$ -OG as determined by SEC-MALLS. The sample was applied to size-exclusion chromatography on a Superdex 200 column. The chromatogram shows detector readings of the light scattering detector (Rayleigh ratio), the UV<sub>280</sub> detector, and the refractive index detector (dRI). The horizontal lines indicate the calculated mass of MPER-TM2 (24 kDa), detergent micelle in the complex (65 kDa), MPER-TM2-detergent complex (89 kDa) and free detergent micelle (38 kDa). The molecular weight of the MPER-TM2 (residues 650 to 711) monomer is 7.2 kDa.

(C) SEC analysis of MPER-TM2 alone and in complex with LN01 demonstrates complex formation in a buffer containing Fos-Choline-12. MPER-TM2 is monomeric in this buffer. The SDS-PAGE of a central fraction of the LN01-MPER-TM2 peak reveals the presence of MPER-TM2 and the Fab.

(D) SPR analyses of 10E8 and LN01 interaction with MPER-TM1 and MPER-TM2 in buffers containing  $\beta$ -OG and Fos-Choline-12. Injections were performed in the range of 1 to 2048 nM. The raw data is shown in full lines and the fits are drawn as dashed lines. The  $\chi^2$  of the fits and the calculated  $K_d$  are shown as insets.

(E) Sequence Conservation of gp41 MPER and the transmembrane domain (TM). Upper panel, comparison of 5448 sequences of HIV-1, M group (A-K plus recombinants) from <http://www.hiv.lanl.gov>. Middle panel, main residues interacting with bNAbs 4E10, 10E8, DH511.1 and LN01. Lower panel, consensus amino acid sequences of the TM region of HIV-1, HIV-2 and SIV showing the positions of the conserved glycine residues.



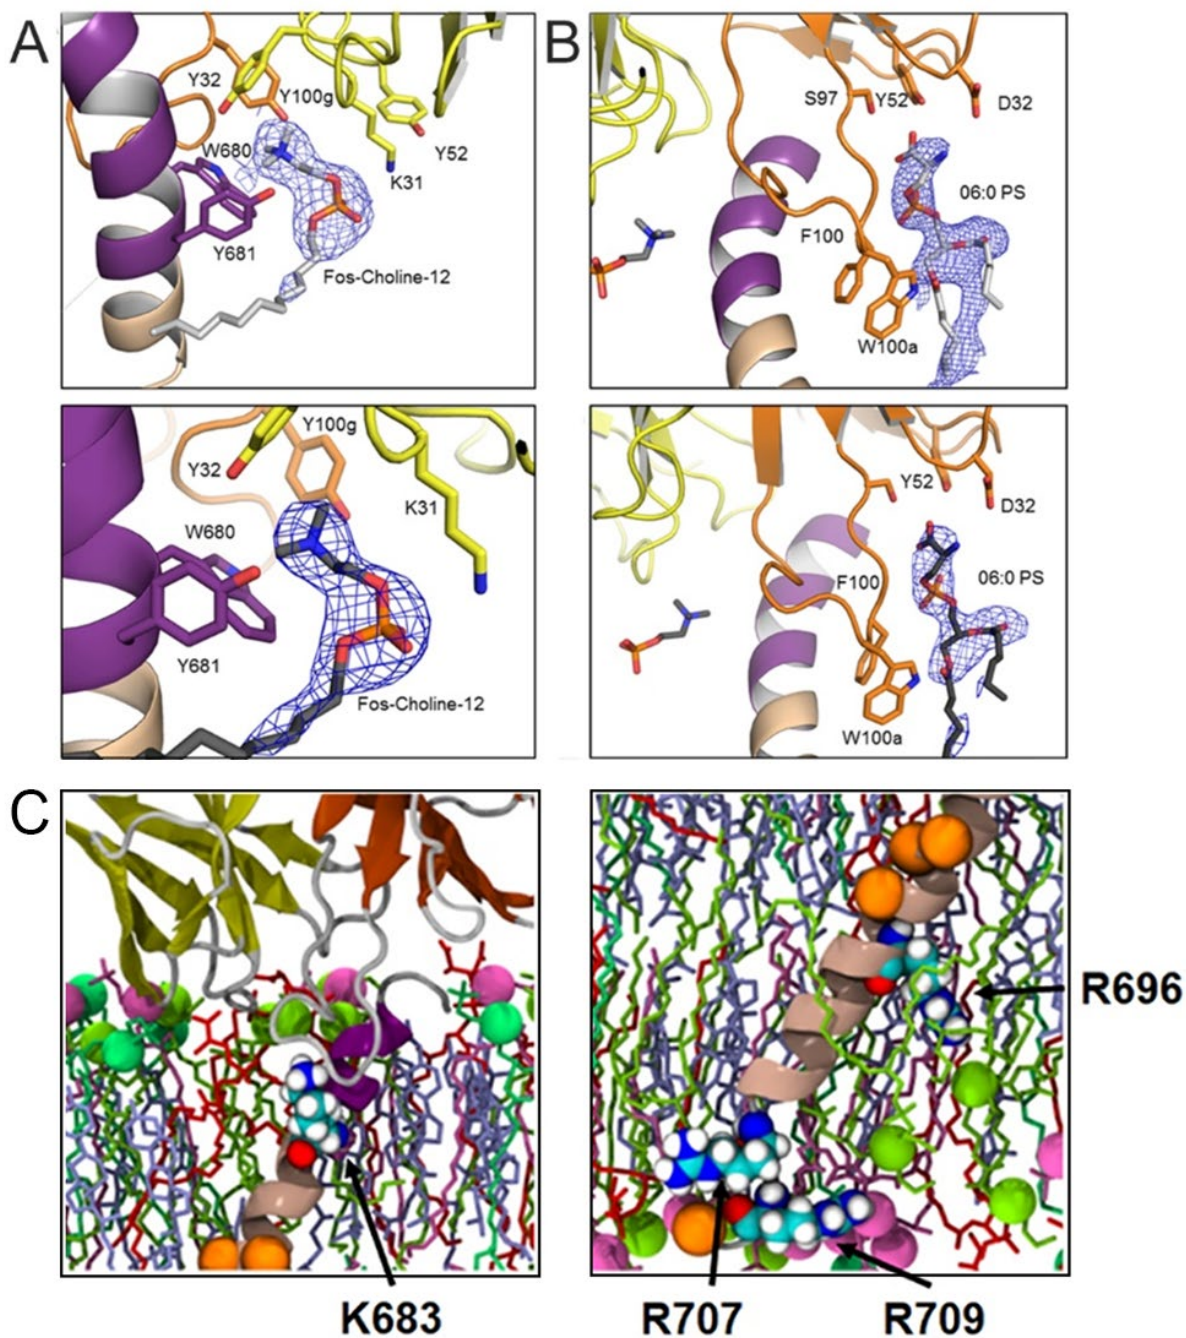

**Figure S6 related to Figures 5B, 6 and 7. Molecular details of Fos-Choline-12 and 06:0 PS interaction and of transmembrane residues with lipid head groups.** (A) Fos-Choline-12 and (B) 06:0 PS binding. The 2Fo-Fc composite omit map ( $1\sigma$  level) is represented as a blue mesh around the ligands Fos-Choline-12 (A) and 06:0 PS (B). The 2Fo-Fc map ( $1\sigma$  level) calculated after refinement is represented as a blue mesh around the ligands Fos-Choline-12 (A lower panel) and 06:0 PS (B lower panel). All residues potentially interacting (within  $3.5\text{ \AA}$ ) with the lipids are represented in sticks. (C) Close-up of the LN01 Fab in complex with MPER-TM2 positioned in a lipid bilayer by MD simulation. The lipid bilayer is composed of POPC (turquoise), POPE (yellow-green), POPS (red), SSM (pink) and cholesterol (mauve). The lipid head groups are represented as van der

Waals spheres of the corresponding color. The light chain of the LN01 Fab is shown in yellow and the heavy chain in orange (left panel). Conserved basic residues positioned to contact lipid head groups on the Ab binding side of the bilayer are shown on the left panel and those present on the on the opposite side of the bilayer are shown on the right panel.

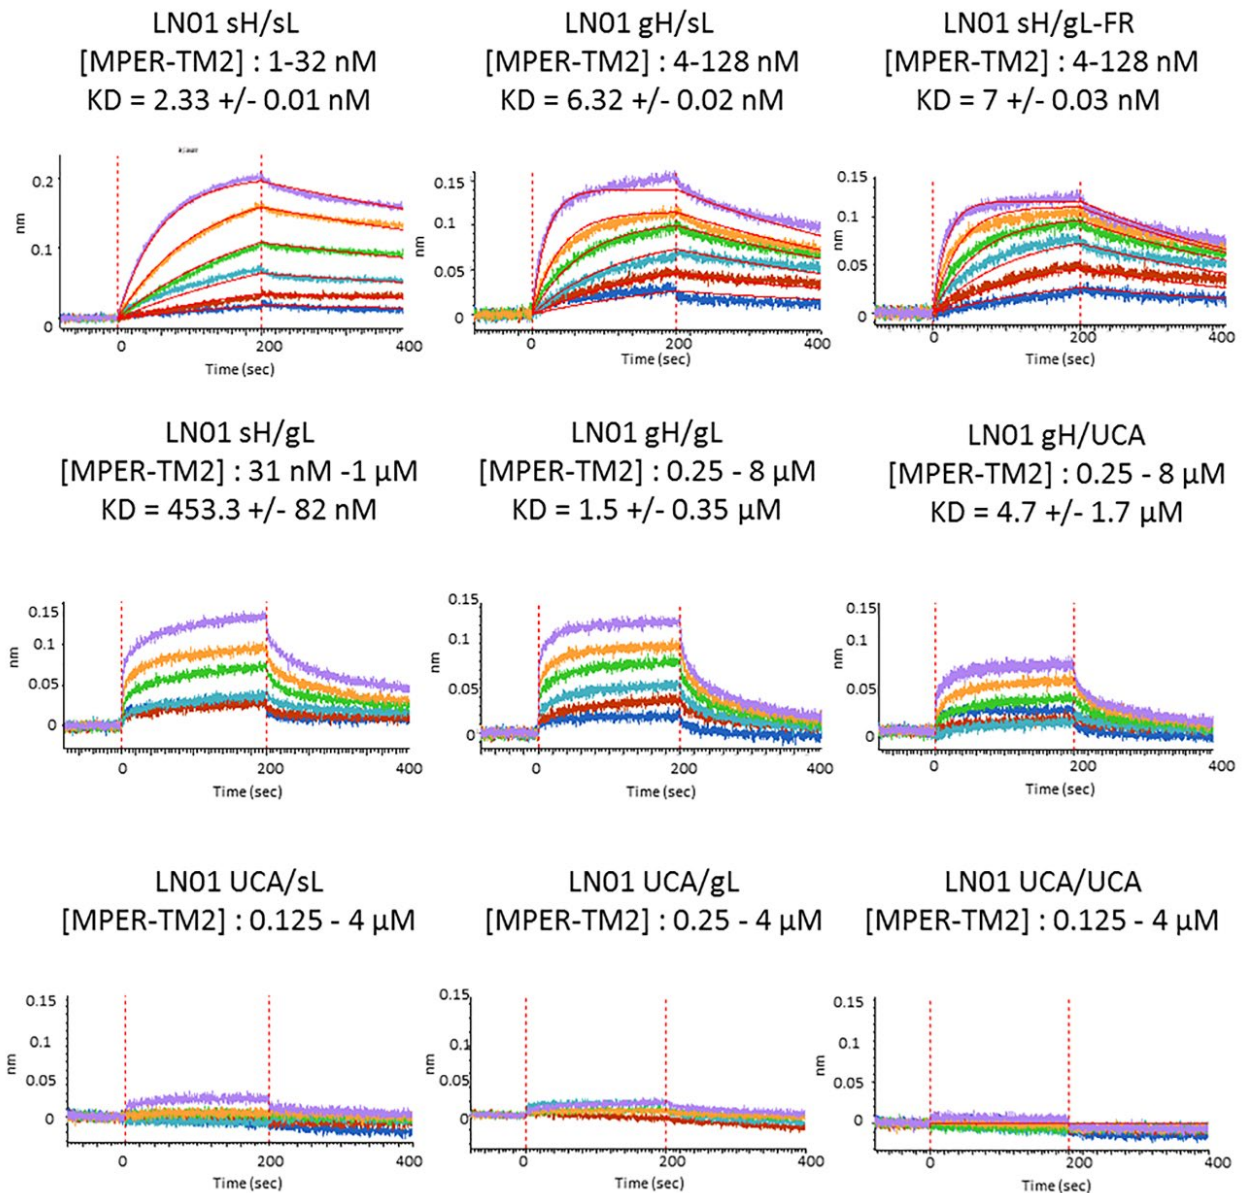

**Figure S7 related to Figures 1D and E: Binding of LN01 variants to gp41 MPER-TM2 as measured by Bio-layer interferometry (BLI).** Colored lines represent the response curves (blue is the lowest concentration and purple the highest). For LN01 sH/sL, LN01 gH/sL and LN01 sH/gL-FR the red line represents the best fit (1:1 model, see STAR\*METHODS).

**Table S1 related to Figures 2A, B. Breadth, and potency of LN01 mAb against 118 HIV-1 PVs.** LN01 and 10E8 were tested in micro-neutralization assay on TZM-bl target cells against the extended panel of 118 HIV-1 PVs. Shown are the IC50 and IC80 values. Color code: red < 1 µg/ml; orange 1-10 µg/ml; yellow > 10 µg/ml.

| Virus ID           | Clade*  | Titer in TZM-bl cells (ug/ml) |       |        |       |
|--------------------|---------|-------------------------------|-------|--------|-------|
|                    |         | IC50                          |       | IC80   |       |
|                    |         | LN01                          | 10E8  | LN01   | 10E8  |
| 6535.3             | B       | 1.031                         | 0.081 | 6.072  | 1.32  |
| QH0692.42          | B       | 0.515                         | 0.442 | 4.028  | 4.046 |
| SC422661.8         | B       | 0.292                         | 0.445 | 1.446  | 2.715 |
| PVO.4              | B       | 0.403                         | 0.747 | 3.793  | >10   |
| TRO.11             | B       | 0.185                         | 0.034 | 0.855  | 0.250 |
| AC10.0.29          | B       | 1.894                         | 0.132 | 7.928  | 1.534 |
| RHPA4259.7         | B       | 10.306                        | 0.728 | >25    | 5.275 |
| THRO4156.18        | B       | 9.831                         | 0.156 | >25    | 0.884 |
| REJO4541.67        | B       | 0.291                         | 0.203 | 2.261  | 1.686 |
| TRJO4551.58        | B       | 8.416                         | 0.475 | >25    | 4.783 |
| WITO4160.33        | B       | 0.224                         | 0.094 | 1.599  | 1.226 |
| CAAN5342.A2        | B       | 2.242                         | 1.284 | 18.329 | 9.281 |
| WEAU_d15_410_5017  | B (T/F) | 2.471                         | >10   | >25    | >10   |
| 1006_11_C3_1601    | B (T/F) | 0.548                         | 0.172 | 3.885  | 2.999 |
| 1054_07_TC4_1499   | B (T/F) | 0.092                         | 0.046 | 0.551  | 0.305 |
| 1056_10_TA11_1826  | B (T/F) | 0.060                         | 0.134 | 0.562  | 1.028 |
| 1012_11_TC21_3257  | B (T/F) | 0.641                         | 0.244 | 8.756  | 4.211 |
| 6240_08_TA5_4622   | B (T/F) | 1.978                         | 0.756 | 14.746 | 5.591 |
| 6244_13_B5_4576    | B (T/F) | 0.088                         | 0.086 | 0.445  | 0.809 |
| 62357_14_D3_4589   | B (T/F) | 5.043                         | 0.119 | 20.028 | 1.060 |
| SC05_8C11_2344     | B (T/F) | 0.710                         | 0.665 | 4.945  | 2.736 |
| Du156.12           | C       | 0.146                         | 0.034 | 0.473  | 0.144 |
| Du172.17           | C       | 0.059                         | 0.109 | 0.285  | 0.837 |
| Du422.1            | C       | 0.929                         | 0.351 | 6.282  | 1.883 |
| ZM197M.PB7         | C       | 0.127                         | 0.148 | 0.977  | 0.802 |
| ZM214M.PL15        | C       | 0.840                         | 1.962 | 7.766  | >10   |
| ZM233M.PB6         | C       | 0.673                         | 0.442 | 3.060  | 2.393 |
| ZM249M.PL1         | C       | 0.944                         | 1.511 | 4.646  | 6.294 |
| ZM53M.PB12         | C       | 11.114                        | 3.985 | >25    | >10   |
| ZM109F.PB4         | C       | 0.618                         | 0.295 | 4.857  | 1.888 |
| ZM135M.PL10a       | C       | 0.710                         | 0.171 | 3.469  | 1.186 |
| CAP45.2.00.G3      | C       | 1.878                         | 1.817 | 10.787 | >10   |
| CAP210.2.00.E8     | C       | >25                           | 0.798 | >25    | 3.892 |
| HIV-001428-2.42    | C       | 24.689                        | 0.809 | >25    | 7.298 |
| HIV-0013095-2.11   | C       | 0.028                         | 0.031 | 0.136  | 0.213 |
| HIV-16055-2.3      | C       | 0.174                         | 0.722 | 1.181  | 6.495 |
| HIV-16845-2.22     | C       | 0.040                         | 0.068 | 0.326  | 0.495 |
| Ce1086_B2          | C (T/F) | 0.328                         | 1.162 | 2.851  | 6.934 |
| Ce0393_C3          | C (T/F) | >25                           | 1.179 | >25    | 7.423 |
| Ce1176_A3          | C (T/F) | 1.092                         | 0.867 | 3.786  | 3.923 |
| Ce2010_F5          | C (T/F) | 11.611                        | 1.844 | >25    | 8.612 |
| Ce0682_E4          | C (T/F) | 0.626                         | 1.215 | 7.500  | 7.709 |
| Ce1172_H1          | C (T/F) | 0.070                         | 0.722 | 0.472  | 4.818 |
| Ce2060_G9          | C (T/F) | 4.050                         | 3.520 | 12.431 | >10   |
| Ce703010054_2A2    | C (T/F) | 1.703                         | 2.299 | 8.142  | 8.579 |
| BF1266.431a        | C (T/F) | >25                           | 2.687 | >25    | >10   |
| 246F_C1G           | C (T/F) | 4.894                         | 2.217 | 15.945 | 9.937 |
| 249M_B10           | C (T/F) | 2.769                         | 1.271 | 8.389  | 9.050 |
| ZM247v1(Rev-)      | C (T/F) | 0.501                         | 0.506 | 6.465  | 6.745 |
| 7030102001E5(Rev-) | C (T/F) | 4.365                         | 6.707 | 16.490 | >10   |
| 1394C9G1(Rev-)     | C (T/F) | 5.964                         | 0.963 | 23.305 | 5.327 |
| Ce704809221_1B3    | C (T/F) | 3.078                         | 0.058 | 15.769 | 0.319 |
| CNE19              | BC      | 1.206                         | 0.666 | 6.774  | 6.485 |
| CNE20              | BC      | 0.018                         | 1.246 | 0.050  | 6.577 |
| CNE21              | BC      | 0.053                         | 1.900 | 0.317  | >10   |
| CNE17              | BC      | 1.112                         | 1.114 | 5.618  | 5.255 |
| CNE30              | BC      | 0.597                         | 1.560 | 2.081  | 9.842 |
| CNE52              | BC      | >25                           | 0.304 | >25    | 3.056 |
| CNE53              | BC      | 0.321                         | 0.326 | 1.982  | 1.916 |
| CNE58              | BC      | 0.297                         | 1.289 | 0.831  | 8.268 |

| Virus ID        | Clade*         | Titer in TZM-bl cells (ug/ml) |       |        |        |
|-----------------|----------------|-------------------------------|-------|--------|--------|
|                 |                | IC50                          |       | IC80   |        |
|                 |                | LN01                          | 10E8  | LN01   | 10E8   |
| MS208.A1        | A              | >25                           | 0.609 | >25    | 3.717  |
| Q23.17          | A              | 5.513                         | 1.637 | 19.114 | 7.040  |
| Q461.e2         | A              | 2.829                         | 2.111 | 11.579 | >10    |
| Q769.d22        | A              | 6.420                         | 1.667 | 21.297 | 10.000 |
| Q259.d2.17      | A              | 6.498                         | 4.587 | >25    | >10    |
| Q842.d12        | A              | 7.934                         | 4.189 | >25    | >10    |
| 0330.v4.c3      | A              | 8.243                         | 2.006 | >25    | >10    |
| 0260.v5.c36     | A              | >25                           | >10   | >25    | >10    |
| 191955_A11      | A (T/F)        | 1.668                         | 0.680 | 8.709  | 3.532  |
| 191084 B7-19    | A (T/F)        | 2.614                         | 5.156 | 22.185 | >10    |
| 9004SS_A3_4     | A (T/F)        | 0.409                         | 1.160 | 2.923  | 6.761  |
| T257-31         | CRF02_AG       | 21.964                        | 0.880 | >25    | 5.779  |
| 928-28          | CRF02_AG       | 0.086                         | 0.384 | 0.573  | 1.962  |
| 263-8           | CRF02_AG       | 0.355                         | 0.196 | 1.982  | 1.728  |
| T250-4          | CRF02_AG       | 2.202                         | 1.346 | 9.990  | 8.130  |
| T251-18         | CRF02_AG       | >25                           | 2.357 | >25    | >10    |
| T278-50         | CRF02_AG       | 5.102                         | 0.949 | 21.584 | 7.460  |
| T255-34         | CRF02_AG       | 0.277                         | 0.778 | 1.838  | 4.207  |
| 211-9           | CRF02_AG       | 0.583                         | 1.091 | 2.084  | 6.508  |
| 235-47          | CRF02_AG       | 0.874                         | 0.384 | 3.713  | 2.072  |
| 620345.c01      | CRF01_AE       | 1.547                         | 0.455 | 13.141 | 6.002  |
| CNE8            | CRF01_AE       | 0.028                         | NT    | 0.259  | NT     |
| C1080.c03       | CRF01_AE       | 0.124                         | 0.061 | 0.653  | 0.731  |
| R2184.c04       | CRF01_AE       | 0.890                         | 0.272 | 7.371  | 2.455  |
| R1166.c01       | CRF01_AE       | 0.603                         | 0.274 | 3.454  | 2.614  |
| R3265.c06       | CRF01_AE       | 3.139                         | >10   | >25    | >10    |
| C2101.c01       | CRF01_AE       | 0.739                         | 1.921 | 6.352  | 8.260  |
| C3347.c11       | CRF01_AE       | 0.901                         | 0.016 | 2.939  | 0.167  |
| C4118.c09       | CRF01_AE       | 2.022                         | 1.622 | 12.752 | 9.064  |
| CNE5            | CRF01_AE       | 4.345                         | 1.408 | 17.424 | 9.637  |
| BJOX009000.02.4 | CRF01_AE       | 1.212                         | 1.570 | 6.676  | 9.954  |
| BJOX015000.11.5 | CRF01_AE (T/F) | 0.529                         | 0.051 | 8.603  | 1.909  |
| BJOX010000.06.2 | CRF01_AE (T/F) | 0.353                         | 0.341 | 1.605  | 5.293  |
| BJOX025000.01.1 | CRF01_AE (T/F) | 0.186                         | 0.107 | 1.263  | 6.325  |
| BJOX028000.10.3 | CRF01_AE (T/F) | 1.097                         | 0.665 | 18.970 | 7.361  |
| X1193_c1        | G              | 0.851                         | 0.497 | 6.106  | 4.195  |
| P0402_c2_11     | G              | 3.836                         | 0.172 | 18.720 | 3.288  |
| X1254_c3        | G              | 3.005                         | 4.753 | 12.477 | >10    |
| X2088_c9        | G              | >25                           | >10   | >25    | >10    |
| X2131_C1_B5     | G              | 0.229                         | 0.189 | 1.559  | 0.974  |
| P1981_C5_3      | G              | 0.115                         | 0.057 | 0.422  | 0.285  |
| X1632_S2_B10    | G              | 1.846                         | 1.976 | 7.366  | 9.684  |
| 3016.v5.c45     | D              | 0.250                         | 0.476 | 1.103  | 4.393  |
| A07412M1.vrc12  | D              | 0.326                         | 0.576 | 2.655  | 6.054  |
| 231965.c01      | D              | 9.503                         | >10   | >25    | >10    |
| 231966.c02      | D              | 0.948                         | 0.191 | 5.484  | 3.130  |
| 191821_E6_1     | D (T/F)        | 1.239                         | 1.413 | 4.886  | 7.737  |
| 3817.v2.c59     | CD             | 14.639                        | 1.181 | >25    | 5.977  |
| 6480.v4.c25     | CD             | 6.271                         | 8.079 | >25    | >10    |
| 6952.v1.c20     | CD             | 0.168                         | 0.343 | 1.392  | 1.907  |
| 6811.v7.c18     | CD             | 5.002                         | 7.535 | 18.990 | >10    |
| 89-F1_2_25      | CD             | 3.043                         | 1.112 | 21.607 | 10.000 |
| 3301.v1.c24     | AC             | 7.543                         | 4.628 | 24.230 | >10    |
| 6041.v3.c23     | AC             | 1.720                         | 2.333 | 11.549 | 9.766  |
| 6540.v4.c1      | AC             | 3.885                         | 1.899 | 19.733 | 10.000 |
| 6545.v4.c1      | AC             | 2.977                         | 1.778 | 19.229 | 8.229  |
| 0815.v3.c3      | ACD            | 0.384                         | 0.332 | 5.546  | 2.868  |
| 3103.v3.c10     | ACD            | >25                           | >10   | >25    | >10    |

\* (T/F): Transmitted / Founder Virus

\*\*MPI: Maximum Percent Inhibition

**Table S2 related to Figures 5 and 6. Crystallographic data collection and refinement statistics.**

| <b>Data collection</b>                                          | LN01/MPER-TM1*                             | LN01/MPER-TM2**                                | LN01/MPER-TM1+06 PS*                      |
|-----------------------------------------------------------------|--------------------------------------------|------------------------------------------------|-------------------------------------------|
| Space group                                                     | P 4 <sub>3</sub> 2 <sub>1</sub> 2          | P 2 <sub>1</sub> 2 <sub>1</sub> 2 <sub>1</sub> | P 4 <sub>3</sub> 2 <sub>1</sub> 2         |
| Cell dimensions                                                 |                                            |                                                |                                           |
| a, b, c (Å)                                                     | 136.76, 136.76,<br>146.90                  | 65.68, 144.61, 409.50                          | 137.71, 137.71,<br>146.72                 |
| α, β, γ (°)                                                     | 90, 90, 90                                 | 90, 90, 90                                     | 90, 90, 90                                |
| Resolution (Å)                                                  | 47.00-3.20 (3.31-<br>3.20) <sup>1</sup>    | 49.63-3.90 (4.09-3.90)<br><sup>1</sup>         | 48.91-3.10 (3.31-<br>3.10) <sup>1</sup>   |
| Unique reflexions                                               | 23542 (2291) <sup>1</sup>                  | 35232 (3519) <sup>1</sup>                      | 26213 (4662) <sup>1</sup>                 |
| R <sub>merge</sub> <sup>2</sup>                                 | 0.088 (1.235) <sup>1</sup>                 | 0.144 (0.555) <sup>1</sup>                     | 0.161 (0.968) <sup>1</sup>                |
| R <sub>pim</sub> <sup>3</sup>                                   | 0.029 (0.395) <sup>1</sup>                 | 0.073 (0.279) <sup>1</sup>                     | 0.068 (0.415) <sup>1</sup>                |
| I / σI                                                          | 21.6 (1.7) <sup>1</sup>                    | 7.0 (2.7) <sup>1</sup>                         | 8.8 (1.9) <sup>1</sup>                    |
| Completeness (%)                                                | 99.69 (99.48) <sup>1</sup>                 | 96.2 (97.7) <sup>1</sup>                       | 99.8 (99.8) <sup>1</sup>                  |
| Redundancy                                                      | 9.6 (9.9) <sup>1</sup>                     | 4.2 (4.3) <sup>1</sup>                         | 7.1 (7.1) <sup>1</sup>                    |
| CC (1/2)                                                        | 0.999 (0.688) <sup>1</sup>                 | 0.995 (0.776) <sup>1</sup>                     | 0.995 (0.671)                             |
| <b>Refinement</b>                                               |                                            |                                                |                                           |
| Resolution (Å)                                                  | 47.00 - 3.20 (3.51 -<br>3.20) <sup>1</sup> | 48.64 - 3.9 (4.039 -<br>3.9) <sup>1</sup>      | 46.21 - 3.1 (3.211 -<br>3.1) <sup>1</sup> |
| No. reflections                                                 | 23526 (2285) <sup>1</sup>                  | 35206 (3518) <sup>1</sup>                      | 26131 (2565) <sup>1</sup>                 |
| Reflections used for<br>R <sub>free</sub> <sup>5</sup>          | 1208 (117) <sup>1</sup>                    | 1726 (174) <sup>1</sup>                        | 1336 (124) <sup>1</sup>                   |
| R <sub>work</sub> <sup>4</sup> / R <sub>free</sub> <sup>5</sup> | 0.213 / 0.253                              | 0.218/0.260                                    | 0.238/0.267                               |
| No. atoms                                                       |                                            |                                                |                                           |
| Protein                                                         | 7090                                       | 14832                                          | 7118                                      |
| Ligand/ion                                                      | 83                                         | 166                                            | 92                                        |
| Water                                                           | 0                                          | 0                                              | 0                                         |
| Wilson B (Å <sup>2</sup> )                                      | 85                                         | 105                                            | 77                                        |
| Average B-factors (Å <sup>2</sup> )                             |                                            |                                                |                                           |
| Overall                                                         | 96                                         | 124                                            | 69                                        |
| Protein                                                         | 96                                         | 124                                            | 69                                        |
| Ligand/ion                                                      | 137                                        | 137                                            | 81                                        |
| Water                                                           |                                            |                                                |                                           |
| R.m.s deviations                                                |                                            |                                                |                                           |
| Bond lengths (Å)                                                | 0.010                                      | 0.007                                          | 0.004                                     |
| Bond angles (°)                                                 | 1.47                                       | 1.17                                           | 1.15                                      |
| Ramachandran Plot<br>(%)                                        |                                            |                                                |                                           |
| Favoured                                                        | 96.22                                      | 95.39                                          | 95.80                                     |
| Outliers                                                        | 0.33                                       | 0.85                                           | 0.44                                      |
| PDB ID                                                          | 6SNC                                       | 6SNE                                           | 6SND                                      |

\*1 crystal was used for the structure; \*\*2 crystals was used for the structure; <sup>1</sup> Statistics for the highest resolution shell.

<sup>1</sup> Parentheses refer to outer shell statistics.

<sup>2</sup>  $R_{\text{merge}} = \sum_{hkl} \sum_i | I_{hkl,i} - \langle I_{hkl} \rangle | / \sum_{hkl} \sum_i I_{hkl,i}$ , where  $I_{hkl,i}$  is the scaled intensity of the  $i$ th measurement of

reflection  $h, k, l$ , and  $\langle I_{hkl} \rangle$  is the average intensity for that reflection.

<sup>3</sup>  $R_{\text{pim}} = \sum_{hkl} (1/(n-1))^{1/2} \sum_i | I_{hkl,i} - \langle I_{hkl} \rangle | / \sum_{hkl} \sum_i I_{hkl,i}$ , where  $n$  is the number of time a given reflexion has been measured.

<sup>4</sup>  $R_{\text{work}} = \sum_{hkl} | F_o - F_c | / \sum_{hkl} | F_o | \times 100$ , where  $F_o$  and  $F_c$  are the observed and calculated structures factors.

<sup>5</sup>  $R_{\text{free}}$  was calculated as for  $R_{\text{work}}$ , but on a test set of 5% of the data excluded from refinement.

**Table S3 related to Figure 5. Contact residues between gp41 and LN01.** The contact distances (cut-off 3.5 Å) were calculated based on the LN01/MPER-TM1+06:0 PS structure.

| gp41                                    |     |     | LN01                                   |        |     | Contact              |               |
|-----------------------------------------|-----|-----|----------------------------------------|--------|-----|----------------------|---------------|
| Residue name, number , interacting atom |     |     | Residue name, number, interacting atom |        |     | residue distance (Å) | Hydrogen bond |
| Asn                                     | 671 | ND2 | Tyr                                    | H 58   | CD1 | 3.3                  |               |
| Phe                                     | 673 | CD1 | Trp                                    | H 100h | CE2 | 3.4                  |               |
| Phe                                     | 673 | CD2 | Trp                                    | L 96   | CH2 | 3.5                  |               |
| Phe                                     | 673 | CE2 | Thr                                    | H 50   | CG2 | 3.4                  |               |
| Asp                                     | 674 | OD1 | Ser                                    | L 93   | C   | 3.5                  |               |
|                                         |     |     | Thr                                    | L 94   | CA  | 3.3                  |               |
|                                         |     |     | Thr                                    | L 94   | N   | 3.2                  | ***           |
| Asp                                     | 674 | OD2 | Thr                                    | L 94   | CB  | 3.1                  |               |
| Thr                                     | 676 | O   | Ser                                    | H 100f | CB  | 3.3                  |               |
| Thr                                     | 676 | OG1 | Trp                                    | H 100h | NE1 | 3.0                  | ***           |
| Asn                                     | 677 | OD1 | Tyr                                    | L 32   | CE2 | 3.2                  |               |
|                                         |     |     | Tyr                                    | L 32   | CZ  | 3.5                  |               |
| Asn                                     | 677 | ND2 | His                                    | L 92   | ND1 | 3.2                  | ***           |
|                                         |     |     | His                                    | L 92   | O   | 2.9                  | ***           |
| Trp                                     | 680 | CD1 | Phe                                    | H 100e | O   | 3.2                  |               |
|                                         |     |     | Ser                                    | H 100f | OG  | 3.3                  |               |
| Lys                                     | 683 | CD  | Phe                                    | H 100  | O   | 3.3                  |               |
| Lys                                     | 683 | CE  | Phe                                    | H 100  | O   | 3.1                  |               |
| Lys                                     | 683 | NZ  | Phe                                    | H 100  | O   | 2.5                  | ***           |
|                                         |     |     | Trp                                    | H 100a | CA  | 3.4                  |               |
|                                         |     |     | Trp                                    | H 100a | C   | 3.4                  |               |
|                                         |     |     | Ser                                    | H 100b | O   | 3                    | ***           |
| Met                                     | 687 | SD  | Trp                                    | H 100a | CZ3 | 3.4                  |               |

H, Ab heavy chain; L, Ab light chain
